# Supplementary material for: A Novel Phytogenic Formulation, EUBIO-BPSG, as a Promising One Health Approach to Replace Antibiotics and Promote Reproduction Performance in Laying Hens
Source: MDPI journal article supplement (doi:10.3390/bioengineering10030346), 2023-03-10
Supplement: s1 [file s1]

# **A novel phytogetic formulation, EUBIO-BPSG, as a promising One Health approach to reducing antibiotic use and its negative impact and promote reproduction performance in laying hens**

Hieu Tran Nguyen Minh<sup>1,2#</sup>, Tien-Fen Kuo<sup>1#</sup>, Wen-Yu Lin<sup>3</sup>, Tzu-Chia Peng<sup>1</sup>, Greta Yang<sup>1</sup>, Chih-Yu Lin<sup>1</sup>, Ting-Hsiang Chang<sup>1</sup>, Yu-Liang Yang<sup>1</sup>, Cheng-Hsun Ho<sup>1</sup>, Bor-Rung Ou<sup>3</sup>, Chu-Wen Yang<sup>4\*</sup>, Wen-Chin Yang<sup>1,2,5,6,7\*</sup> and Yu-Chuan Liang<sup>1,3\*</sup>

## **MATERIALS AND METHODS**

### **DNA extraction, NGS analysis, and PCR confirmation of gut microbiota.**

The DNA extraction and NGS analysis of 16S rDNA and gut microbiome from laying hens fed with standard diet or the diet supplemented with BP (250 ppm) were performed as described in the Materials and Methods section of the manuscript. Species-specific primers located within 16S rRNA, *tuf*, *yaiO*, and *hisJ* genes were used in PCR to characterize *L. reuteri*, *L. oris*, *E. coli*, and *S. enterica*, respectively.

### **Isolation, selection, and mass spectrometry-based identification of fecal bacteria.**

Fresh stools were collected from aged hens fed with a standard diet and pooled. After a serial dilution, the gut bacteria were grown on pre-reduced agar plates. One set of media was incubated at 37°C for 3 days in an anaerobic chamber. The isolation and selection of *Lactobacillus*, *E. coli* and *Salmonella* were conducted on the selective plates as published<sup>51</sup> under anaerobic conditions at 37°C for 3 days. The procedure of bacterial isolation and identification was delineated in Fig. S3. Briefly, 16 to 37 isolates were subjected to matrix-assisted laser desorption ionization-time of flight (MALDI-TOF) analysis (Bruker, Billerica, MA). The spectral profiles were used to compare with microbial protein profile databases using an in-house database containing over 4,000 microbial strain protein profiles.

### **Identification of SCFA using the LC-MS/MS.**

A chemical derivatization method was used to identify and quantify short-chain metabolites as published<sup>52</sup>. Briefly, the supernatants (40 µl) were collected from *L. reuteri* in co-culture with BP (4 µg/ml) or vehicle (0.1% MeOH) in MRS medium for 5, 8, and 16 h. The samples were incubated with <sup>13</sup>C<sub>6</sub>-3NPH·HCl to conjugate short-chain metabolites present in the supernatants. The reaction mixtures were analyzed using Acquity UPLC chromatography coupled to a Xevo TQ-XS mass spectrometer (Waters, Millford, MA) with an ESI source in a negative mode (m/z 50 to m/z 250). The identity of each SCFA was based on their MS1 profiles and the quantification of each SCFA was based on their MS2 profiles.

#### **Measurement of bacterial viability.**

Four *E. coli* strains ( $5 \times 10^4$ ) were tested for their viability in LB broth in the presence of an antibiotic, either Amp (100 µg/ml) or Tet (25 µg/ml), and BP at 0 (NC), 0.5, 2.5, 12.5, and 50 µg/ml at 37°C for 18 h. The bacterial growth rate (%) was calculated by the ratio of the optical density at 600 nm (OD<sub>600</sub>) of the treatment to that of the NC multiplied by 100%.

## SUPPLEMENTARY TABLES

**Table S1.** The number of sequences, OTUs, taxonomy (phylum, class, order, family, and genus), richness (Chao1), and diversity (Shannon index) in 16S rDNA data obtained from the control (CTR) and BP-fed (BP) fecal samples.

| Sample | Sequence |      |        |       |       |        |       |        | Shannon |
|--------|----------|------|--------|-------|-------|--------|-------|--------|---------|
| DNA    | No.      | OTUs | Phylum | Class | Order | Family | Genus | Chao1  | index   |
| CTR    | 46490    | 418  | 11     | 18    | 48    | 94     | 143   | 442    | 6.07    |
| BP     | 46490    | 159  | 6      | 13    | 26    | 46     | 83    | 186.08 | 4.27    |

The data are the same as Fig. 2.

**Table S2.** Bacterial strains used in this study.

| Strains                                                             | Characteristic                                                                          | Source     |
|---------------------------------------------------------------------|-----------------------------------------------------------------------------------------|------------|
| Bacterial strains used for functional and mechanistic studies       |                                                                                         |            |
| <i>L. reuteri</i>                                                   | F275 [DSM 20016]                                                                        | ATCC 23272 |
| <i>E. coli</i>                                                      | FDA strain Seattle 1946 [DSM 1103]                                                      | ATCC 25922 |
| <i>S. enterica</i>                                                  | NCTC 4444                                                                               | ATCC 4931  |
| <i>E. coli</i> stains used for conjugation and recombination assays |                                                                                         |            |
| β2163                                                               | <i>pir</i> <sup>+</sup> donor harboring pD042                                           | 30         |
| UB5201                                                              | <i>pir</i> <sup>-</sup> recipient harboring p929 and p3938                              | 30         |
| <i>E. coli</i> stains used for recombination assays                 |                                                                                         |            |
| UB5201                                                              | <i>pir</i> <sup>-</sup> recipient harboring p929 and p3938                              | 30         |
| <i>E. coli</i> stains used for conjugation assays                   |                                                                                         |            |
| BM21                                                                | F <sup>-</sup> donor harboring RP4                                                      | 31         |
| MG1656                                                              | Plasmid-free F <sup>+</sup> recipient ( $\Delta dapA(::frr)$ <i>recA</i> <sup>-</sup> ) | 31         |

|                                                                      |                                                                                                                                                           |               |
|----------------------------------------------------------------------|-----------------------------------------------------------------------------------------------------------------------------------------------------------|---------------|
|                                                                      | (Tn10))                                                                                                                                                   |               |
| Strains used <i>in vitro</i> recombination assay by Gateway reaction |                                                                                                                                                           |               |
| DH5 $\alpha$                                                         | <i>supE44</i> $\Delta$ <i>lacU169</i> ( $\Phi$ 80 <i>lacZ'</i> $\Delta$ <i>M15</i> ) $\Delta$ <i>argF</i><br><i>hsdR17 recA1 endA1 gyrA96 thi-1 relA1</i> | ATCC PTA-1798 |

**Table S3.** Plasmids used in this study.

| Plasmids                    | Characteristic                                                                                                                    | Reference                        |
|-----------------------------|-----------------------------------------------------------------------------------------------------------------------------------|----------------------------------|
| pD042                       | pSW23T:: <i>attCaadA7</i> , <i>oriVR6K<math>\gamma</math></i> , <i>chl</i> <sup>R</sup>                                           | 30                               |
| p929                        | pSU38 $\Delta$ :: <i>attI1</i> , <i>ori</i> <sub>p15A</sub> , <i>kan</i> <sup>R</sup>                                             | 30                               |
| p3938                       | pBAD18:: <i>intI1</i> , <i>ori</i> <sub>ColE1</sub> , <i>car</i> <sup>R</sup>                                                     | 30                               |
| RP4                         | IncP $\alpha$ , <i>car</i> <sup>R</sup> , <i>kan</i> <sup>R</sup>                                                                 | 31                               |
| pBluescript KS <sup>+</sup> | A plasmid containing <i>amp</i> <sup>R</sup>                                                                                      | Stratagene                       |
| pDONR221                    | A Gateway plasmid containing <i>attP1</i> , <i>attP2</i> , a suicide gene <i>ccdB</i> , and <i>kan</i> <sup>R</sup>               | ThermoFisher<br>Cat. No. 2536017 |
| pEXP7-Tet                   | A linearized Gateway plasmid containing <i>tet</i> <sup>R</sup> , used as a positive control in the <i>in vitro</i> recombination | ThermoFisher                     |

**Table S4.** Medium cultures and selections that were used for bacteria.

| Medium                                 | Antibiotics and/or<br>Supplements | Strains & Notes   |
|----------------------------------------|-----------------------------------|-------------------|
| For functional and mechanistic studies |                                   |                   |
| MRS broth or agar                      | –                                 | <i>L. reuteri</i> |
| LB broth or agar                       | –                                 | <i>E. coli</i>    |

|                                          |                                                                                  |                                                                         |
|------------------------------------------|----------------------------------------------------------------------------------|-------------------------------------------------------------------------|
| LB broth or agar                         | –                                                                                | <i>S. enterica</i>                                                      |
| For conjugation and recombination assay. |                                                                                  |                                                                         |
| LB broth or agar                         | Chl (25 µg/ml), Kan (25 µg/ml), and DAP (0.3 mM)                                 | β2163 ( <i>pir</i> <sup>+</sup> donor)                                  |
| LB broth or MH agar                      | Car (100 µg/ml), Kan (25 µg/ml), Glu (10 mg/ml), and dT (0.3 mM)                 | UB5201 ( <i>pir</i> <sup>–</sup> recipient)                             |
| LB agar                                  | DAP (0.3 mM), Ara (2 mg/ml), Glu (10 mg/ml), and dT (0.3 mM)                     | Mix of β2163 & UB5201 (for conjugation and recombination to take place) |
| LB broth                                 | DAP (0.3 mM), Glu (10 mg/ml), and dT (0.3 mM)                                    | Mix of β2163 & UB5201 (for mixing and diluting)                         |
| MHA agar                                 | Chl (25 µg/ml), Car (100 µg/ml), Kan (25 µg/ml), Glu (10 mg/ml), and dT (0.3 mM) | Recombinant                                                             |
| Transformation and recombination assay   |                                                                                  |                                                                         |
| LB broth                                 | Glu (10 mg/ml) and dT (0.3 mM)                                                   | UB5201 competent                                                        |
| LB broth                                 | Ara (2 mg/ml), Glu (10 mg/ml), and dT (0.3 mM)                                   | UB5201 (for cell recovery)                                              |
| MH agar                                  | Car (100 µg/ml), Kan (25 µg/ml), Glu (10 mg/ml), and dT (0.3 mM)                 | UB5201 ( <i>pir</i> <sup>–</sup> recipient)                             |

|                                                              |                                                                                  |                                                                                              |
|--------------------------------------------------------------|----------------------------------------------------------------------------------|----------------------------------------------------------------------------------------------|
| MH agar                                                      | Chl (25 µg/ml), Car (100 µg/ml), Kan (25 µg/ml), Glu (10 mg/ml), and dT (0.3 mM) | Recombinant                                                                                  |
| For conjugation assay                                        |                                                                                  |                                                                                              |
| LB broth or agar                                             | Car (100 µg/ml) and Kan (25 µg/ml)                                               | BM21                                                                                         |
| LB broth or agar                                             | Tet (15 µg/ml) and DAP (0.3 mM)                                                  | MG1656                                                                                       |
| LB broth                                                     |                                                                                  | BM21 (for washing)                                                                           |
| LB broth                                                     | DAP (0.3 mM)                                                                     | MG1656 (for washing)                                                                         |
| LB agar                                                      | Car (100 µg/ml), Kan (25 µg/ml), Tet (15 µg/ml), and DAP (0.3 mM)                | Transconjugant                                                                               |
| For <i>in vitro</i> recombination assay in Gateway reactions |                                                                                  |                                                                                              |
| LB broth or agar                                             |                                                                                  | DH5α competent                                                                               |
| LB agar                                                      | Amp (100 µg/ml)                                                                  | DH5α recombinant ( <i>attB</i> -flanked PCR products ( <i>amp</i> <sup>R</sup> ) & pDONR221) |
| LB agar                                                      | Tet (20 µg/ml)                                                                   | DH5α recombinant (pEXP7-Tet & pDONR221)                                                      |

**Table S5.** Primers used in this study.

| Name | Sequences (5'–3') | Purpose | PCR products |
|------|-------------------|---------|--------------|
|------|-------------------|---------|--------------|

|          |                                                                 |                                                                     | (bp) |
|----------|-----------------------------------------------------------------|---------------------------------------------------------------------|------|
| 16SPCRF  | TCGTCGGCAGCGTCAGATGTGT<br>ATAAGAGACAGCCTACGGGNG<br>GCWGCAG      | Amplifying<br>the V3 - V4<br>hypervariable<br>sequencing<br>regions | 300  |
| 16SPCRR  | GTCTCGTGGGCTCGGAGATGT<br>GTATAAGAGACAGGACTACHV<br>GGGTATCTAATCC |                                                                     |      |
| 16SLR1   | GGCTATCACTCTGGGATGGA                                            | Identifying <i>L.</i><br><i>reuteri</i>                             | 280  |
| 16SLR2   | GGATACCGTCACTGCGTAAC                                            |                                                                     |      |
| tuf F421 | GAA ATC GTTGGTTTG ACTGAA<br>G                                   | Identifying <i>L.</i><br><i>oris</i>                                | 159  |
| tuf R579 | TTCAGCAAGAACTTG ACC A                                           |                                                                     |      |
| yaiOF    | TGATTTCCGTGCGTCTGAATG                                           | Identifying <i>E.</i><br><i>coli</i>                                | 115  |
| yaiOR    | ATGCTGCCGTAGCGTGTTTC                                            |                                                                     |      |
| HisJF    | ACTGGCGTTATCCCTTTCTCTG<br>GTG                                   | Identifying <i>S.</i><br><i>enterica</i>                            | 495  |
| HisJR    | ATGTTGTCCTGCCCCTGGTAAG<br>AGA                                   |                                                                     |      |
| SWbeg    | CCGTCACAGGTATTTATTCGGC<br>G                                     | Validating the<br><i>attC</i> × <i>attI</i><br>recombination        | 488  |
| MFD      | CGCCAGGGTTTTCCAGTCAC                                            |                                                                     |      |
| 12attB1  | AAAAAGCAGGCTGGTCGGGGA<br>AATGTGC                                | Amplifying<br><i>attB</i> -flanked<br>PCR products                  | 1049 |
| 12attB2  | AGAAAGCTGGGTGGGTCTGAC                                           |                                                                     |      |

|                  |                                   |                                                              |     |
|------------------|-----------------------------------|--------------------------------------------------------------|-----|
|                  | AGTTACCA                          | (amp <sup>R</sup> and its<br>promotor)                       |     |
| attB1<br>adapter | GGGGACAAGTTTGTACAAAAA<br>AGCAGGCT |                                                              |     |
| attB2<br>adapter | GGGGACCACTTTGTACAAGAA<br>AGCTGGGT |                                                              |     |
| M13              | GTAAAACGACGGCCAGT                 | Validating the<br><i>attB</i> × <i>attP</i><br>recombination | 288 |
| HT1              | AGGGAATAAGGGCGACACGG              |                                                              |     |



## SUPPLEMENTARY FIGURES

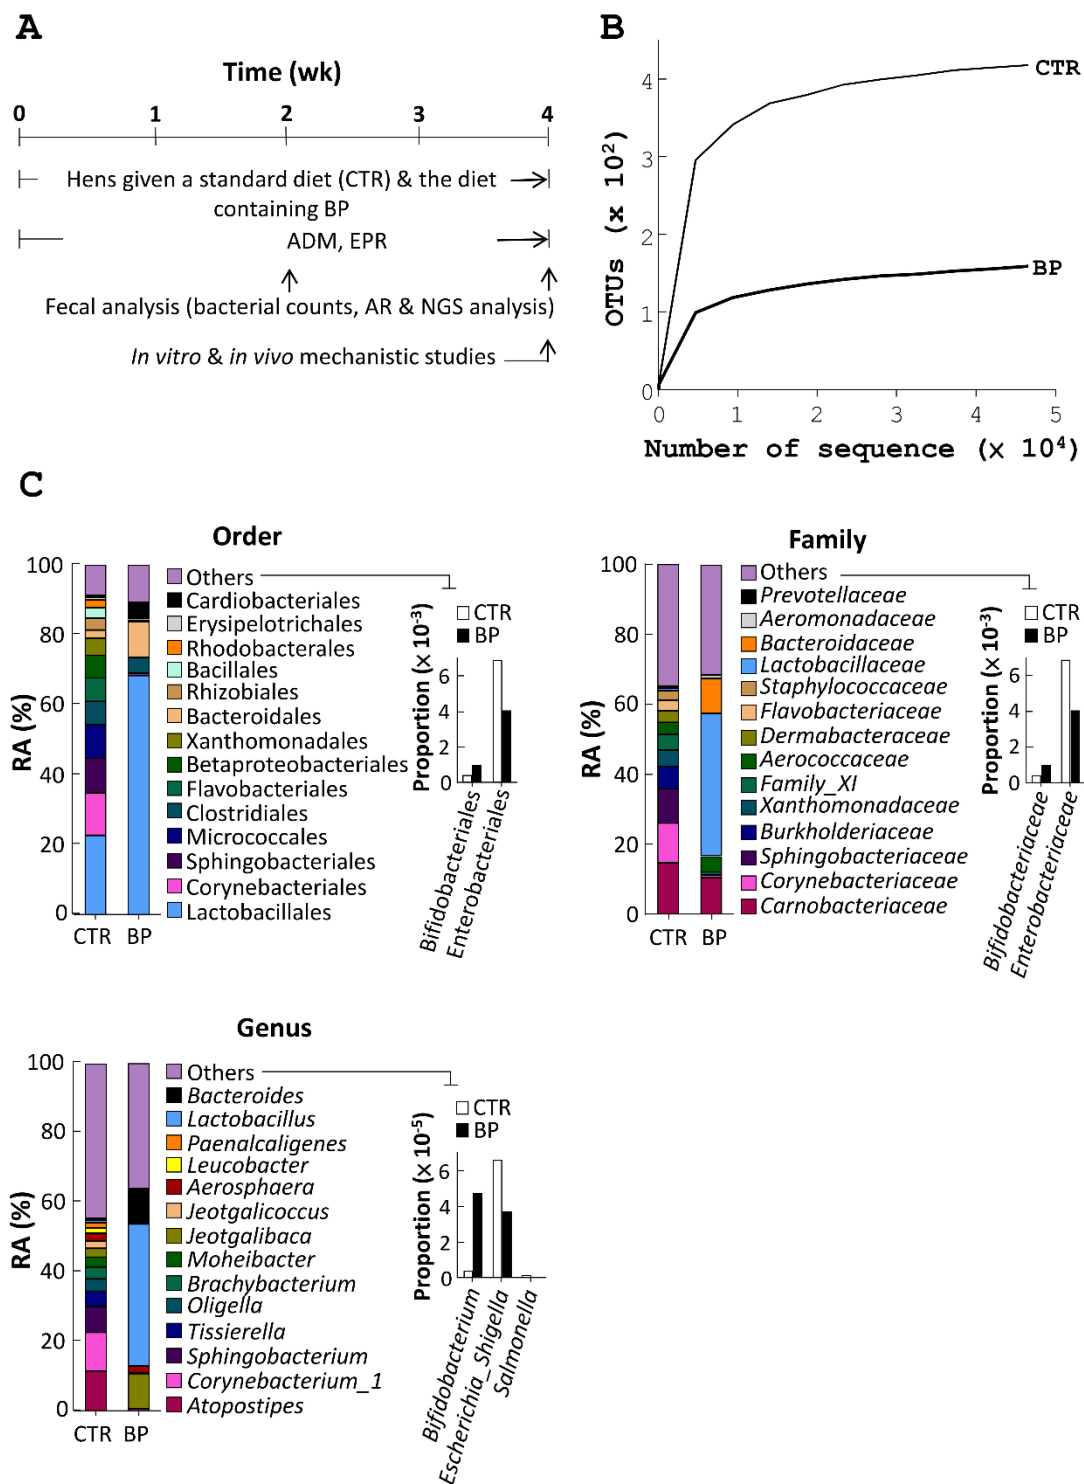

**Fig. S1.** Experimental design and analysis of 16S rDNA sequencing analysis of gut microbiota in aged hens. (A) A flow chart of the experimental design used in this study. (B) Rarefaction curves of bacterial OTUs in the fecal bacteria of control (CTR) and BP-fed hens (Fig. 2) using the 16S rDNA NGS analysis. (C) Analysis of the relative abundance (RA) (left) of fecal bacteria in (B) and small proportions (right) of fecal bacteria of interest at the level of order, family, and genera.

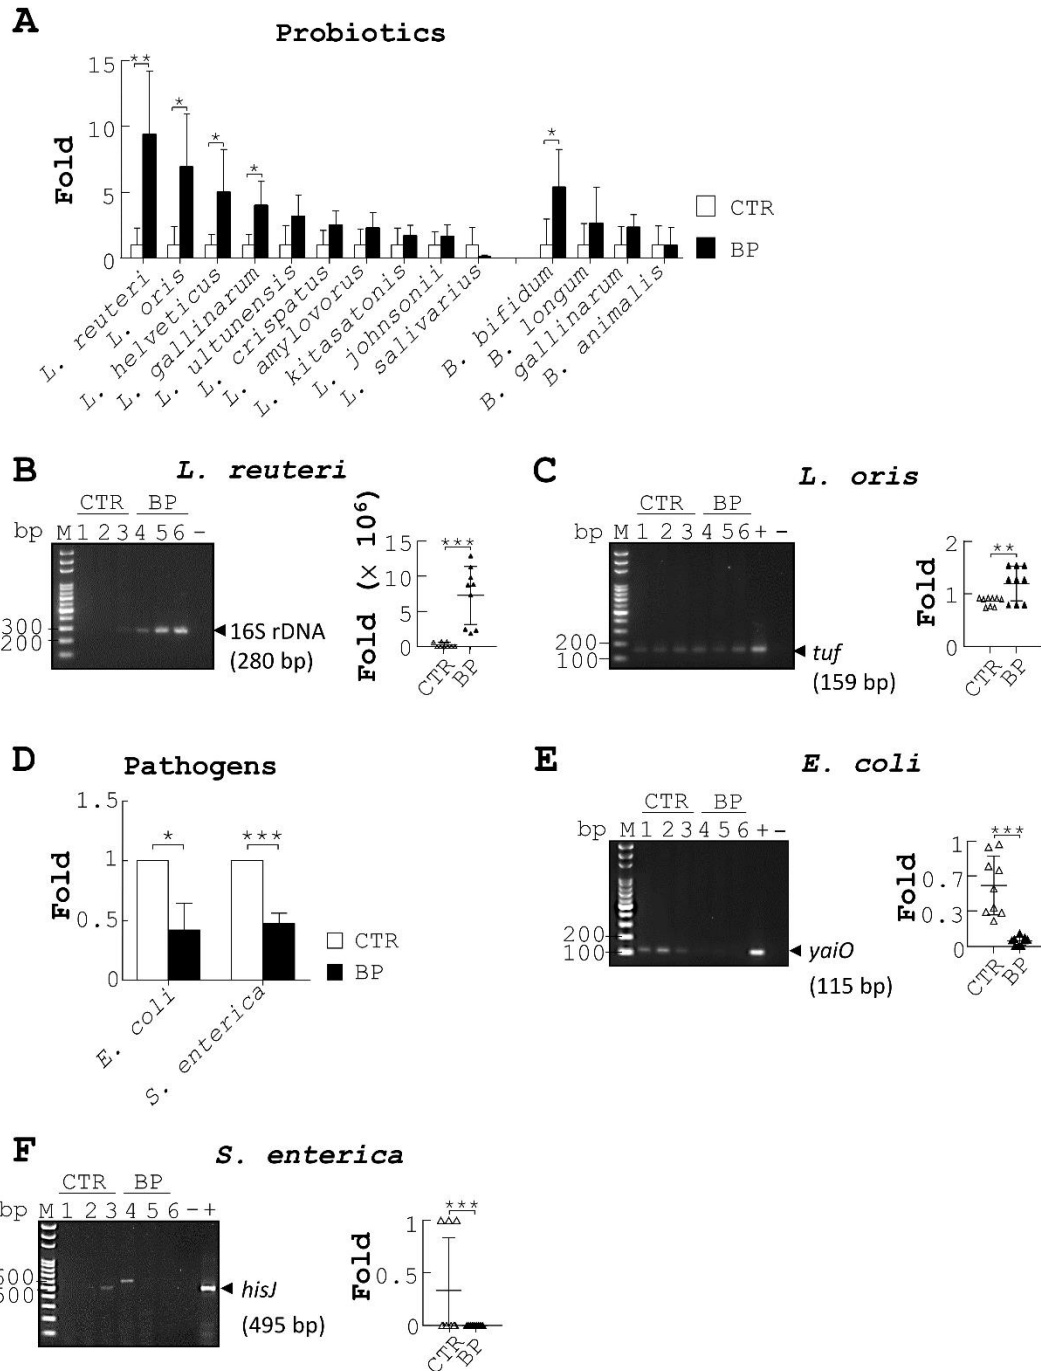

**Fig. S2.** A proportion of probiotic and pathogenic species in the feces of 58-week-old laying hens. (A) The top 10 *Lactobacillus* species (left) and top 4 *Bifidobacterium* species (right) in the fecal bacteria of control (CTR) and BP-fed hens (Fig. 2) were selected and analyzed based on their fold change using the shotgun metagenomic NGS analysis. (B - C) *L. reuteri* (B) and *L. oris* (C) in the fecal bacteria (A) were

confirmed using PCR with a pair of specific primers for 16S rRNA and *tuf* genes, respectively. Their DNA gels were photographed (left) and their signals in PCR gels were quantified and re-plotted into histograms (right). (D) Fold change of *E. coli* and *S. enterica* in the fecal bacteria of control (CTR) and BP-fed hens (A) were analyzed based on their fold change using shotgun metagenomic NGS analysis. (E - F) *E. coli* (E) and *S. enterica* (F) in the fecal bacteria (A) was detected using PCR with specific primers for *yaiO* and *hisJ*, respectively. Their DNA gels were photographed (left) and their signals in PCR gels were quantified and re-plotted into histograms (right). Data of 3 to 6 repeats (A and B) and 9 repeats (C - E) are presented as the mean  $\pm$  SD. One-way ANOVA test was used for statistical analysis of differences between groups and  $P$  (\*) < 0.05,  $P$  (\*\*) < 0.01, and  $P$  (\*\*\*) < 0.001 are considered statistically significant.

**A**

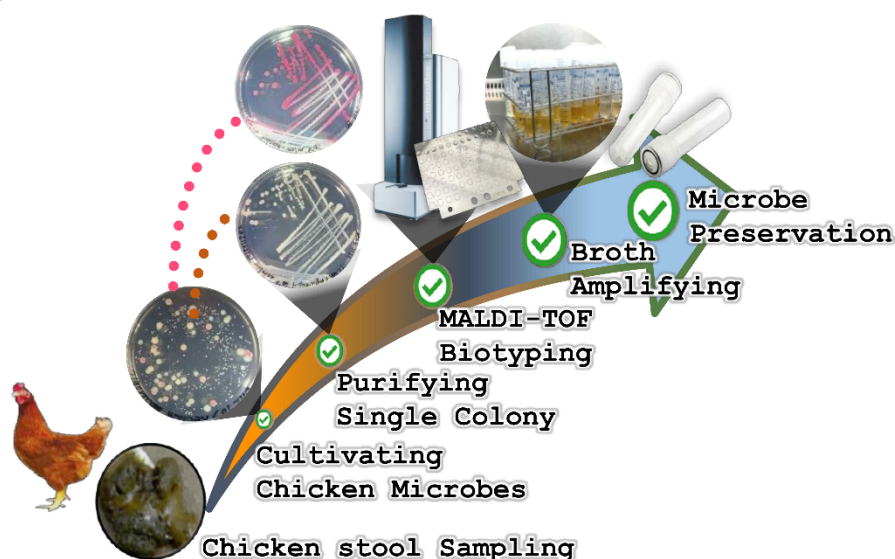

**B**

| No. | Analyte Name | Organism (best match)        | Reference                        | Score Value |
|-----|--------------|------------------------------|----------------------------------|-------------|
| 01  | 200918_0_H12 | <i>Lactobacillus reuteri</i> | DSM 20016T                       | 2.308       |
| 02  | 200918_0_I.2 | <i>Lactobacillus reuteri</i> | DSM 20016T                       | 2.168       |
| 03  | 200918_0_B11 | <i>Lactobacillus reuteri</i> | DSM 20016T                       | 2.018       |
| No. | Analyte Name | Organism (best match)        | Reference                        | Score Value |
| 01  | 200918_0_E7  | <i>Escherichia coli</i>      | ATCC 25922 CHB                   | 2.188       |
| 02  | 200918_0_E10 | <i>Escherichia coli</i>      | ATCC 25922 CHB                   | 2.188       |
| 03  | 200918_0_N1  | <i>Escherichia coli</i>      | ATCC 25922 CHB                   | 2.148       |
| No. | Analyte Name | Organism (best match)        | Reference                        | Score Value |
| 01  | 2_F24        | <i>Salmonella enterica</i>   | Enteritidis<br>25089078 (PX) MLD | 2.251       |
| 02  | 2_P19        | <i>Salmonella enterica</i>   | Enteritidis<br>25089078 (PX) MLD | 2.146       |
| 03  | 2_P10        | <i>Salmonella enterica</i>   | Enteritidis<br>25089078 (PX) MLD | 2.127       |

**Fig. S3.** Isolation, selection and identification of probiotics and pathogenic bacteria from chicken stools. (A) A procedure of chicken fecal bacterial collection, cultivation, isolation, MALDI-TOF analysis, and preservation. (B) Characterization of *L. reuteri*, *E. coli*, and *S. enterica* using the MALDI-TOF MS analysis. The spectral profiles of three species were compared with an in-house microbial protein profile database containing > 4000 bacterial species. Top three mostly matched data

of *L. reuteri* (top), *E. coli* (middle), and *S. enterica* (bottom) are indicated.

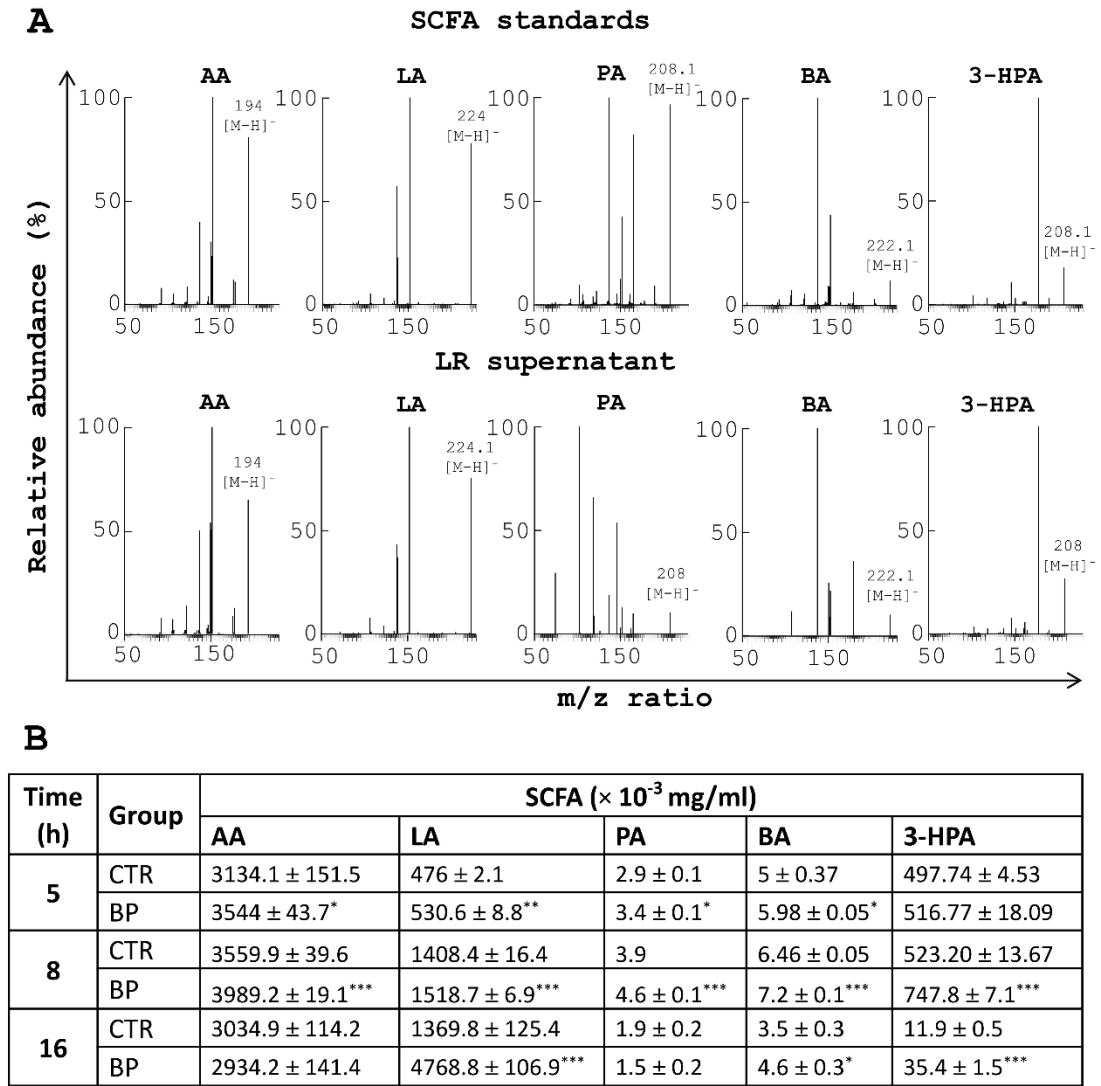

**Fig. S4.** Identification and quantification of SCFA produced by *L. reuteri*. (A) The 5 SCFA in the supernatant of *L. reuteri* grown in MRS broth (bottom) as well as standard compounds (top), including AA, BA, LA, PA, and 3-HPA, were subjected to LC-MS/MS. Representative MS1 profiles of the 5 ion signals corresponding to the 5 SCFA are indicated. (B) The level of the 5 SCFA in the supernatant of *L. reuteri*, grown in MRS broth containing 0.1% methanol (CTR) and BP (4  $\mu$ g/ml), for the indicated time was analyzed and quantified based on the signal of MS2 in the LC-MS/MS data. Data of 3 repeats are presented as the mean  $\pm$  SD. One-way ANOVA test was used for statistical analysis of differences between groups and *P*

$(*) < 0.05$ ,  $P(**) < 0.01$ , and  $P(***) < 0.001$  are considered statistically significant.



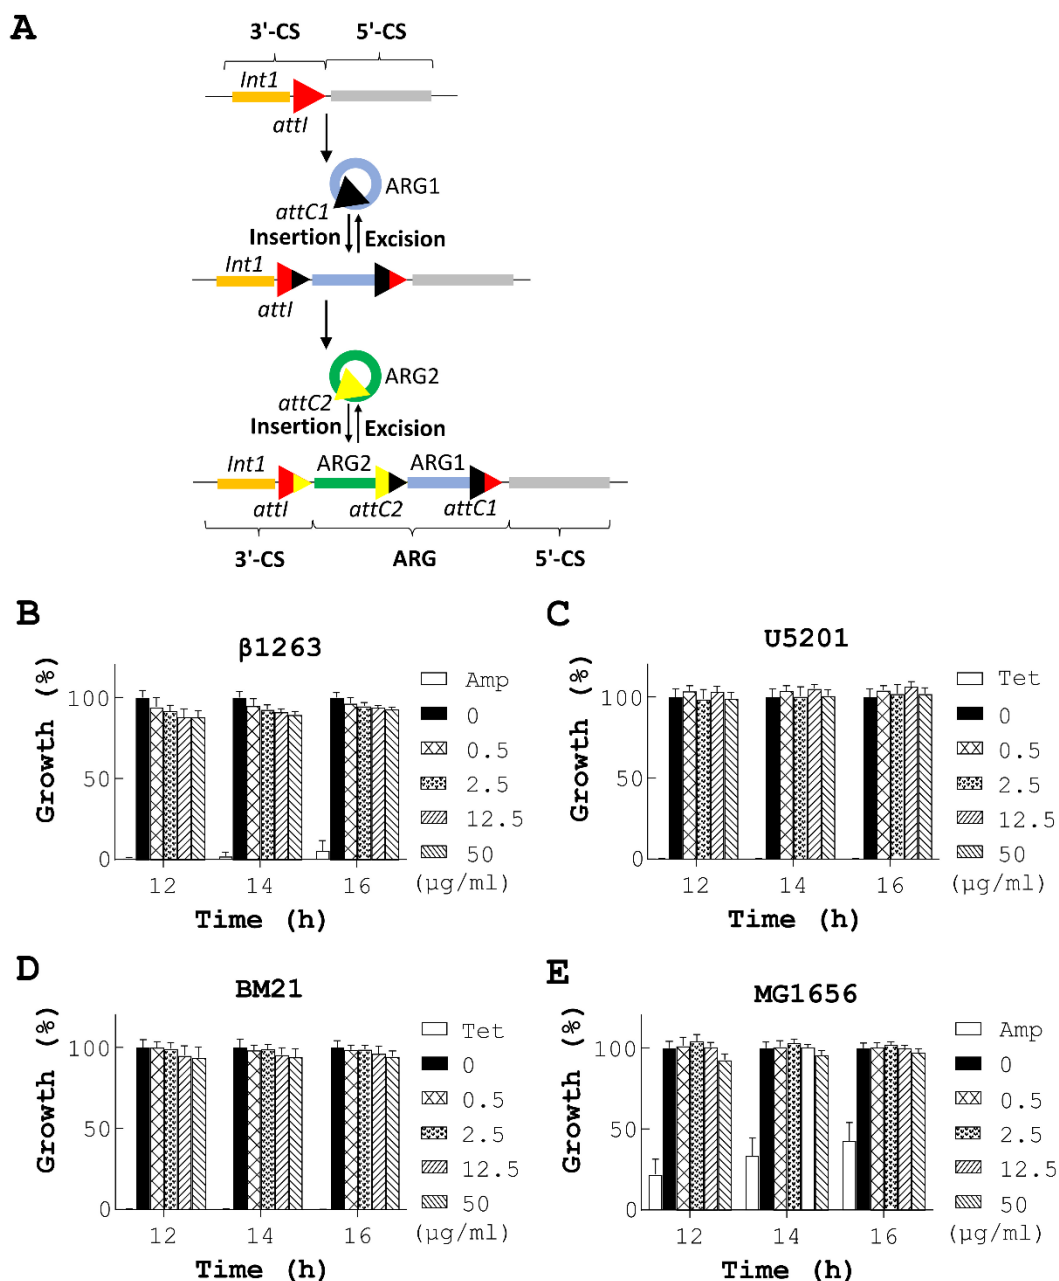

**Fig. S5.** The structure of the class 1 integron and viability test of bacteria used in Fig. 5. (A) A general structure of class 1 integron and the scheme of ARG cassette insertion or excision. The class 1 integron consists of a 5'-conserved segment (5'-CS), comprising *attC* sites and an integrase gene (*Int1*), ARG cassettes, and a 3'-conserved segment (3'-CS). ARG from integrons, plasmids, and chromosomes can insert into or excise from integron via catalysis of integrase and *att* sites. (B - E) *E. coli* strains,

β1263 (B), U5201 (C), BM21 (D), and MG1656 (E), were grown in LB medium containing a positive control, Amp or Tet, and BP at the indicated dosages for 18 h. The growth rate (%) is indicated. Data of 3 repeats are presented as the mean  $\pm$  SD. One-way ANOVA test was used for statistical analysis of differences between groups and  $P$  (\*) < 0.05,  $P$  (\*\*) < 0.01, and  $P$  (\*\*\*) < 0.001 are considered statistically significant.
